# Supplementary material
Source: MDPI journal article supplement (https://www.mdpi.com/2227-9040/11/3/184)
Supplement: s1 [file s1]

## Supporting information

### **Development of pH-independent Naphthalene Monoimide-based Fluorescent Probe for Hg<sup>2+</sup> Detection Inside Lysosome**

Rupam Roy <sup>1</sup>, Tanoy Dutta <sup>1</sup>, Shruti Nema <sup>1</sup> and Apurba Lal Koner<sup>1\*</sup>

<sup>1</sup>Bionanotechnology Lab, Department of Chemistry Indian Institute of Science Education and Research  
Bhopal, Bhopal Bypass Road, Bhauri, Bhopal, Madhya Pradesh, India.

E-mail: [akoner@iiserb.ac.in](mailto:akoner@iiserb.ac.in)

## Table of Contents

| Serial No. | Content                                                        | Page No |
|------------|----------------------------------------------------------------|---------|
| 1.         | $^1\text{H}$ , $^{13}\text{C}$ NMR and HR-MS characterizations | 3-6     |
| 2.         | Spectroscopic data of His-NMI-Bu                               | 7-9     |
| 3.         | DFT calculation                                                | 9-15    |
| 4.         | Job's plot and fitting for binding constant                    | 15-16   |
| 5.         | Evidence for probe-metal complexation:                         | 16-18   |
| 6.         | Bioimaging studies                                             | 19-20   |

# 1. $^1\text{H}$ , $^{13}\text{C}$ NMR and HR-MS characterizations:

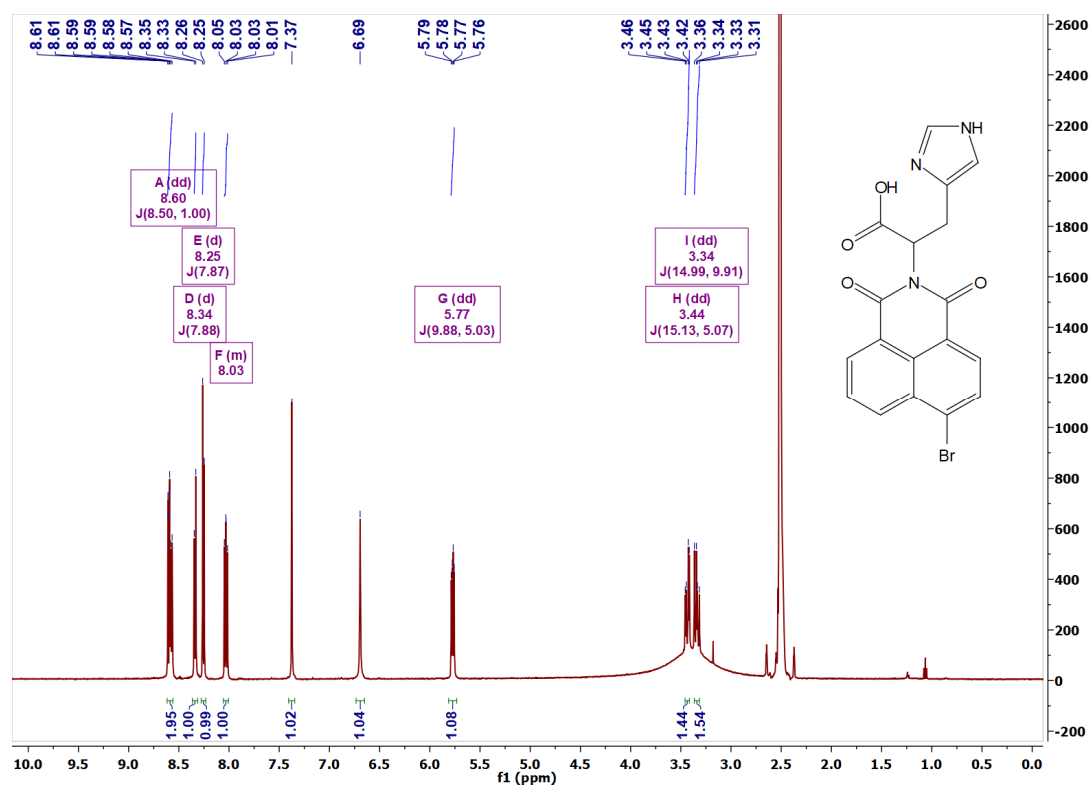

**Figure S1.**  $^1\text{H}$  NMR spectrum of His-NMI-Br in DMSO- $\text{d}_6$  recorded at 500 MHz.

*Note:* Broadening of peaks nearby 3.25 ppm is due to overlapping of the corresponding peaks with  $\text{H}_2\text{O}$  peaks.

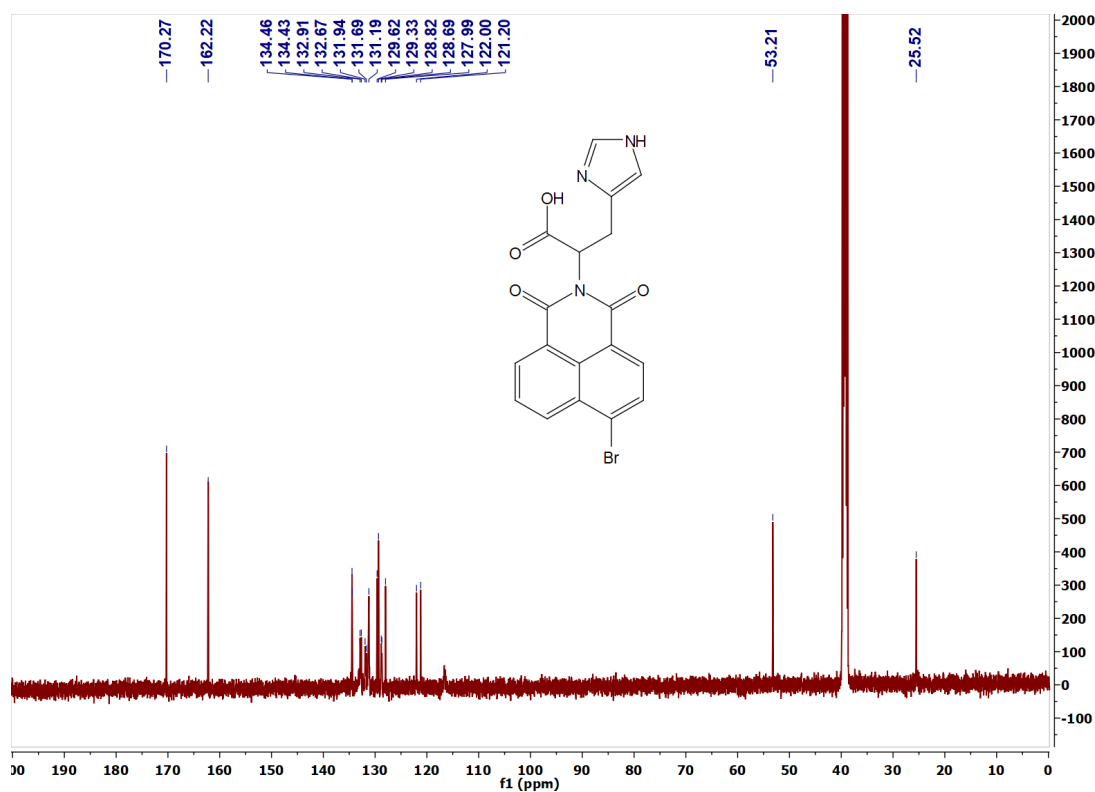

**Figure S2.**  $^{13}\text{C}$  NMR spectrum of His-NMI-Br in DMSO- $\text{d}_6$  recorded at 126 MHz.

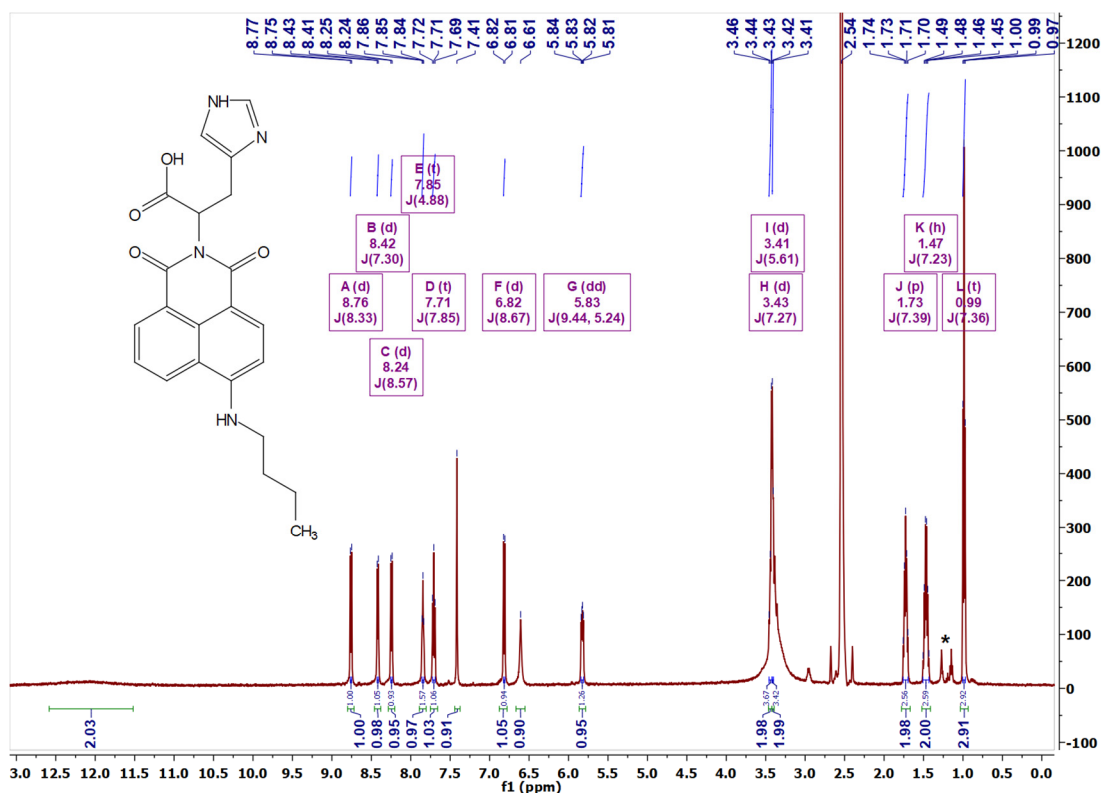

**Figure S3.** <sup>1</sup>H NMR spectrum of His-NMI-Bu in DMSO-d<sub>6</sub> recorded at 500 MHz. \* Indicates the grease peak

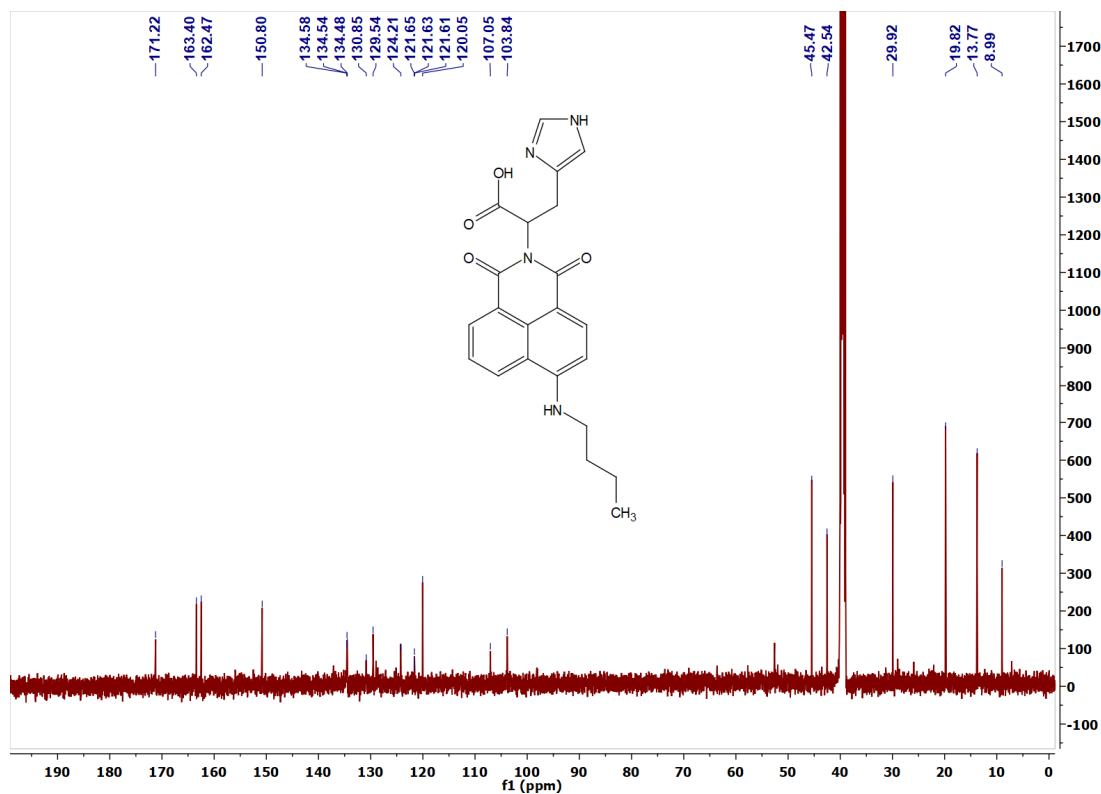

**Figure S4.** <sup>13</sup>C NMR spectrum of His-NMI-Bu in DMSO-d<sub>6</sub> recorded at 126 MHz.

*Note: In <sup>1</sup>H NMR, peak at 2.54 ppm is corresponding to residual solvent peak of DMSO.*

**Acquisition Parameter**

|             |            |                       |           |                  |           |
|-------------|------------|-----------------------|-----------|------------------|-----------|
| Source Type | ESI        | Ion Polarity          | Positive  | Set Nebulizer    | 0.4 Bar   |
| Focus       | Not active | Set Capillary         | 4600 V    | Set Dry Heater   | 180 °C    |
| Scan Begin  | 50 m/z     | Set End Plate Offset  | -500 V    | Set Dry Gas      | 4.0 l/min |
| Scan End    | 3000 m/z   | Set Collision Cell RF | 600.0 Vpp | Set Divert Valve | Waste     |

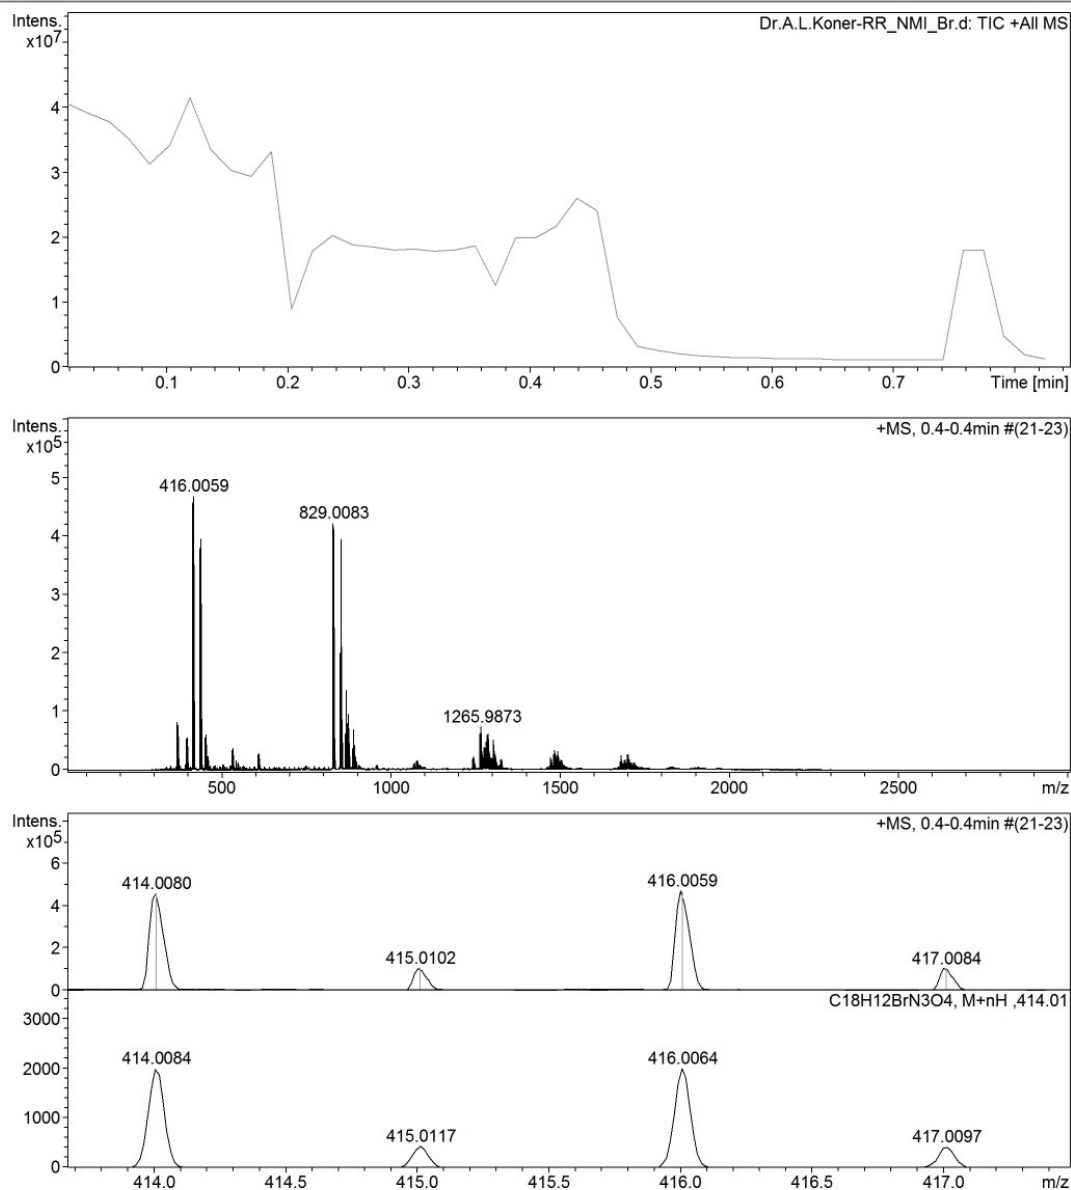

**Figure S5.** ESI mass spectrum of **His-NMI-Br**; **calculated mass** – 414.0089 Da, 416.0069 Da and **obtained mass** – 414.0080 Da, 416.0059 Da  $[M + H]^+$ . Here, two molecular ion peaks with almost equal intensity and m/z difference of 2.0 Da indicate presence of Br atom in the compound. The peak at 829.0087 Da is corresponding to dimer species of **His-NMI-Br**.

$$\text{ppm error} = \frac{\text{Calculated mass} - \text{Obtained mass}}{\text{Calculated mass}} \times 10^6$$

$$= 2.17$$

**Acquisition Parameter**

|             |            |                       |           |                  |           |
|-------------|------------|-----------------------|-----------|------------------|-----------|
| Source Type | APCI       | Ion Polarity          | Positive  | Set Nebulizer    | 0.4 Bar   |
| Focus       | Not active | Set Capillary         | 4000 V    | Set Dry Heater   | 200 °C    |
| Scan Begin  | 50 m/z     | Set End Plate Offset  | -500 V    | Set Dry Gas      | 4.0 l/min |
| Scan End    | 3000 m/z   | Set Collision Cell RF | 600.0 Vpp | Set Divert Valve | Waste     |

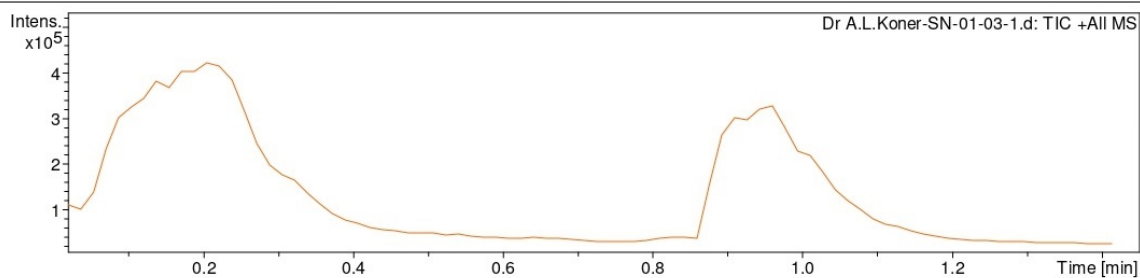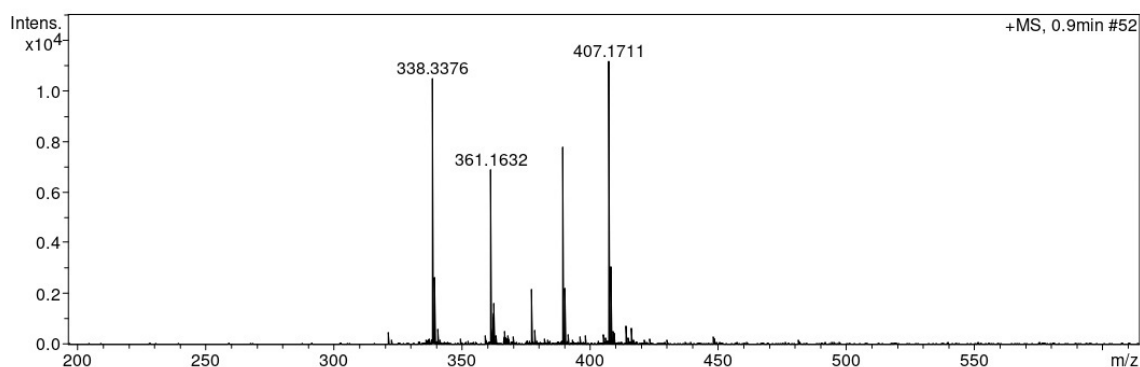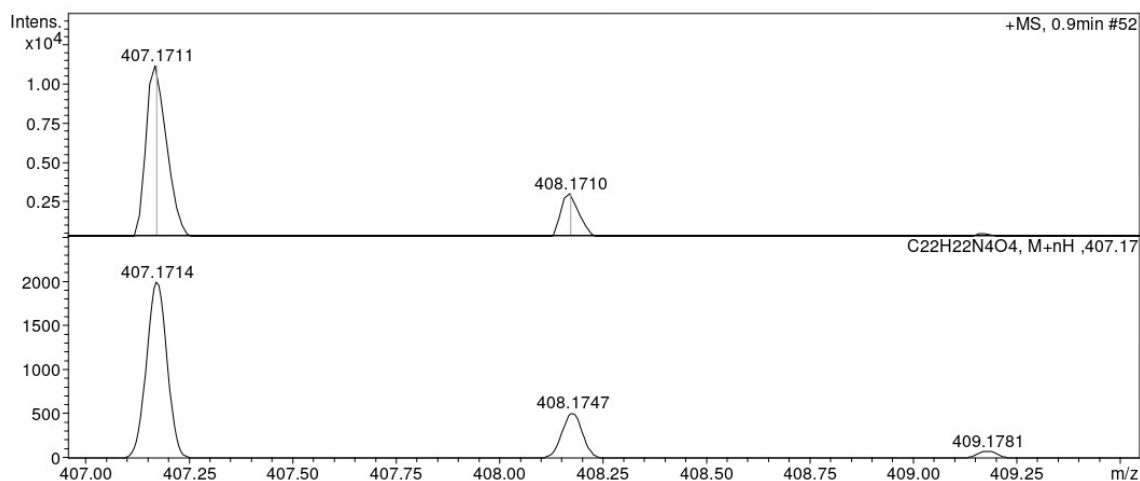

**Figure S6.** APCI mass spectrum of **His-NMI-Bu**; **Calculated mass** – 407.1719 Da and **obtained mass** – 407.1711 Da [M + H]<sup>+</sup>.

$$\text{ppm error} = \frac{\text{Calculated mass} - \text{Obtained mass}}{\text{Calculated mass}} \times 10^6$$
$$= 1.96$$

## 2. Spectroscopic data of His-NMI-Bu:

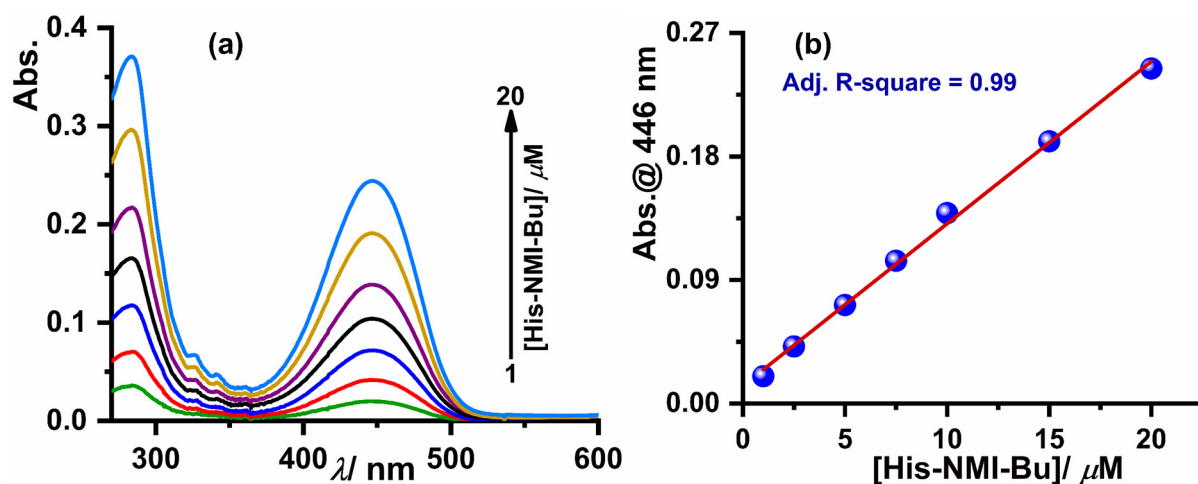

**Figure S7.** (a) UV-Vis. absorption spectra of probe **His-NMI-Bu** as a function of concentration in DMSO (b) Plot for absorbance at 446 nm vs concentration of **His-NMI-Bu** in DMSO.

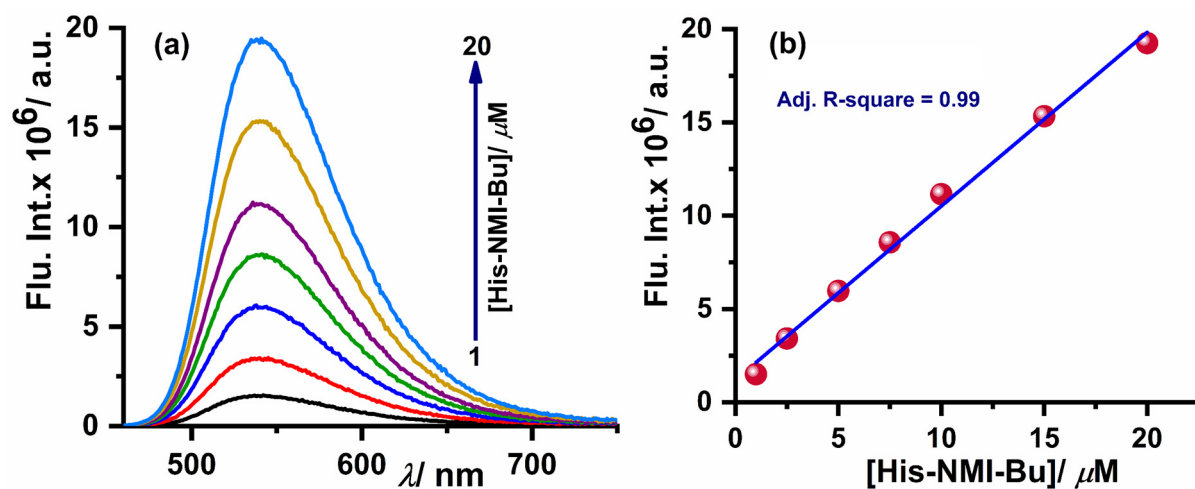

**Figure S8.** (a) Fluorescence spectra of probe **His-NMI-Bu** as a function of concentration in DMSO (b) Plot for fluorescence intensity at 540 nm vs concentration of **His-NMI-Bu** in DMSO.

**Table S1.** Summarization of photophysical data of **His-NMI-Bu** measured in different solvents.

| Solvent           | $\lambda_{max}^{Abs}/$<br>nm | $\lambda_{max}^{Em}/$<br>nm | Stokes<br>shift/ nm | $\tau_i/$ ns (Cont%)  | $\tau_{avg}/$ ns | Rel. $\Phi_{Fl}$ |
|-------------------|------------------------------|-----------------------------|---------------------|-----------------------|------------------|------------------|
| CHCl <sub>3</sub> | 435                          | 522                         | 87                  | 2.4 (3%), 9.7 (97%)   | 9.6              | 0.21             |
| THF               | 437                          | 521                         | 84                  | 10.1 (100%)           | 10.1             | 0.67             |
| 1,4-Dioxane       | 430                          | 520                         | 90                  | 4.9 (12%), 10.5 (88%) | 10.2             | 1.12             |
| EtOH              | 439                          | 535                         | 96                  | 9.2 (100%)            | 9.2              | 0.64             |
| DMF               | 440                          | 529                         | 89                  | 10.2 (100%)           | 10.2             | 0.69             |
| ACN               | 438                          | 534                         | 96                  | 10.1 (100%)           | 10.1             | 0.59             |
| DMSO              | 449                          | 539                         | 90                  | 10.3 (100%)           | 10.3             | 0.81             |
| H <sub>2</sub> O  | 455                          | 562                         | 107                 | 3.4 (40%), 4.3 (60%)  | 4.0              | 0.23             |

**Note:** Relative fluorescence QY of the probe is determined using Fluoresceine as reference dye in aq. NaOH ( $\Phi_{Fl} = 0.95$  in 0.1 N NaOH)

**Table S2.** Radiative and non-radiative decay rates for probe in two solvents.

| Solvent          | $k_r \times 10^8$ (s <sup>-1</sup> ) | $k_{nr} \times 10^8$ (s <sup>-1</sup> ) | $k_r/ k_{nr}$ |
|------------------|--------------------------------------|-----------------------------------------|---------------|
| 1,4-Dioxane      | 1.1                                  | 0.1                                     | 11.0          |
| DMSO             | 0.8                                  | 0.2                                     | 4.0           |
| H <sub>2</sub> O | 0.5                                  | 2.0                                     | 0.25          |

**Note:** The high fluorescence QY obtained in DMSO or 1,4-dioxane is attributed to predominant radiative decay rate from  $S_1$  state to ground state. This is evident from  $k_r$  and  $k_{nr}$  values in three selective solvents such as 1,4-Dioxane, DMSO and H<sub>2</sub>O.



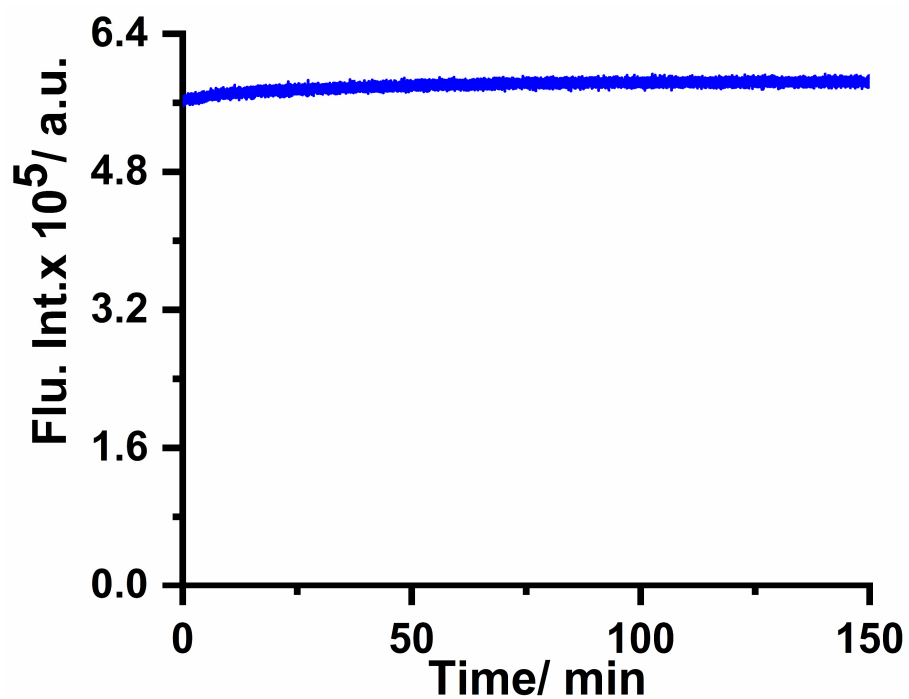

**Figure S9.** Fluorescence kinetics of probe **His-NMI-Bu** ( $10\ \mu\text{M}$ ) in MES buffer ( $\text{pH} = 6.2$ ) monitored at 560 nm under continuous irradiation of 450 W Xenon lamp with light intensity 100 lx.

### 3. DFT calculation:

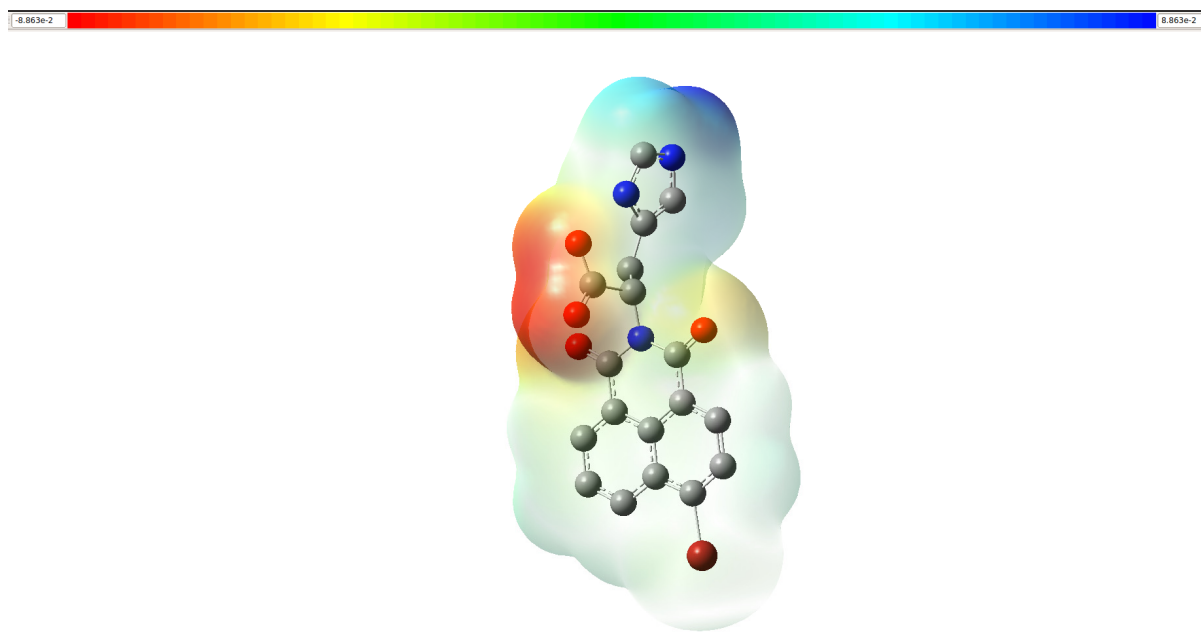

**Figure S10.** Molecular electrostatic potential map for compound **His-NMI-Br**; blue and red colors indicate positive and negative charge.

**Table S3.** Calculated energies of Kohn-Sham molecular orbitals (MO) of **His-NMI-Br** using DFT at the CAM-B3LYP/ LANL2DZ level of theory

| FMOs   | Energy/ Hartree | Energy/ eV |
|--------|-----------------|------------|
| LUMO+5 | 0.04216         | 1.147      |
| LUMO+4 | 0.03338         | 0.908      |
| LUMO+3 | 0.02652         | 0.721      |
| LUMO+2 | 0.00707         | 0.192      |
| LUMO+1 | 0.00191         | 0.052      |
| LUMO   | -0.06449        | -1.754     |
| HOMO   | -0.29536        | -8.037     |
| HOMO-1 | -0.31046        | -8.448     |
| HOMO-2 | -0.32193        | -8.760     |
| HOMO-3 | -0.33013        | -8.983     |
| HOMO-4 | -0.33660        | -9.159     |
| HOMO-5 | -0.34024        | -9.258     |

Compound: **His-NMI-Br**

Symbolic Z-matrix:

Charge = 0 Multiplicity = 1

|   |          |          |          |
|---|----------|----------|----------|
| C | -3.64217 | 1.69153  | -0.54338 |
| C | -3.86448 | -0.75619 | 0.0243   |
| C | -3.08827 | 0.41961  | -0.21667 |
| C | -3.27565 | -1.96428 | 0.34395  |
| C | -2.82401 | 2.78503  | -0.76045 |
| C | -0.85007 | 1.43745  | -0.3527  |
| C | -1.66868 | 0.29953  | -0.11842 |
| C | -1.07537 | -0.94846 | 0.21152  |
| C | -1.86679 | -2.05888 | 0.43973  |
| H | -1.39082 | -2.99876 | 0.69754  |
| C | -1.41611 | 2.66024  | -0.66543 |
| H | -0.76265 | 3.51067  | -0.82888 |
| C | 0.39528  | -1.07367 | 0.33347  |
| C | 0.62429  | 1.33043  | -0.25605 |
| N | 1.16325  | 0.07622  | 0.08476  |
| O | 0.94575  | -2.15453 | 0.63102  |
| O | 1.37955  | 2.29211  | -0.4945  |
| C | 2.60739  | 0.00262  | 0.36361  |
| H | -3.26025 | 3.74818  | -1.00298 |
| H | -3.88719 | -2.84042 | 0.52526  |
| H | -4.71875 | 1.79509  | -0.6176  |
| H | 2.7967   | -1.0451  | 0.61982  |

|    |          |          |          |
|----|----------|----------|----------|
| C  | 2.90104  | 0.82816  | 1.64699  |
| O  | 1.98664  | 1.269    | 2.34911  |
| O  | 4.19829  | 0.97167  | 1.96231  |
| C  | 3.4692   | 0.36537  | -0.87644 |
| H  | 2.91597  | 0.0608   | -1.76993 |
| H  | 3.58684  | 1.44996  | -0.93338 |
| C  | 4.8051   | -0.31583 | -0.88202 |
| N  | 5.63814  | -0.25868 | 0.23913  |
| C  | 6.75096  | -0.91884 | -0.05373 |
| H  | 7.59292  | -1.06251 | 0.60229  |
| H  | 7.39381  | -1.94682 | -1.79945 |
| N  | 6.68124  | -1.40593 | -1.33121 |
| C  | 5.44896  | -1.03219 | -1.86743 |
| H  | 5.14325  | -1.29797 | -2.86497 |
| H  | 4.89566  | 0.49299  | 1.35945  |
| Br | -5.80999 | -0.6938  | -0.08984 |

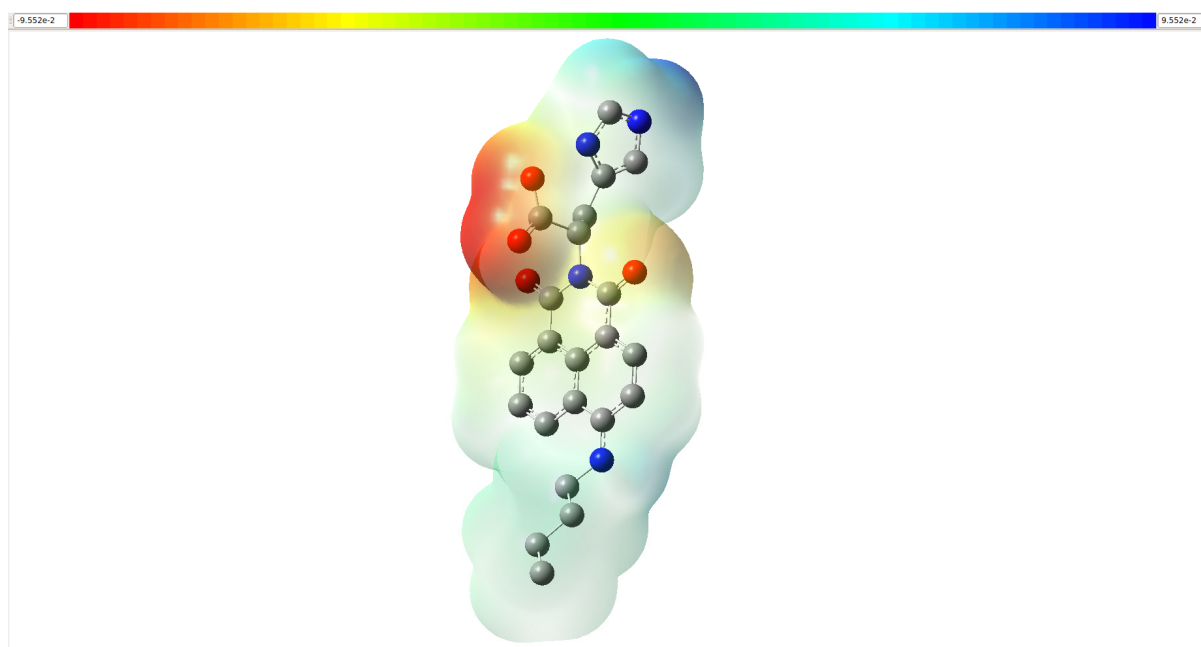

**Figure S11.** Molecular electrostatic potential map for compound **His-NMI-Bu**; blue and red colors indicate positive and negative charge.

**Table S4.** Calculated energies of Kohn-Sham molecular orbitals (MO) of **His-NMI-Bu** using DFT at the CAM-B3LYP/ LANL2DZ level of theory.

| FMOs   | Energy/ Hartree | Energy/ eV |
|--------|-----------------|------------|
| LUMO+5 | 0.07814         | 2.126      |
| LUMO+4 | 0.06231         | 1.687      |
| LUMO+3 | 0.03459         | 0.941      |

|        |          |        |
|--------|----------|--------|
| LUMO+2 | 0.02635  | 0.717  |
| LUMO+1 | 0.01992  | 0.542  |
| LUMO   | -0.04104 | -1.116 |
| HOMO   | -0.25214 | -6.861 |
| HOMO-1 | -0.29914 | -8.140 |
| HOMO-2 | -0.31063 | -8.452 |
| HOMO-3 | -0.31490 | -8.568 |
| HOMO-4 | -0.32022 | -8.713 |
| HOMO-5 | -0.32187 | -8.758 |

Compound: **His-NMI-Bu**

Symbolic Z-matrix:

Charge = 0 Multiplicity = 1

|   |           |          |          |
|---|-----------|----------|----------|
| C | -3.11956  | 1.45558  | -1.07655 |
| C | -3.34745  | -1.01165 | -0.56    |
| C | -2.56858  | 0.20061  | -0.68597 |
| C | -2.67366  | -2.22386 | -0.33099 |
| C | -2.33303  | 2.59069  | -1.1797  |
| C | -0.37243  | 1.31425  | -0.55893 |
| C | -1.15748  | 0.13126  | -0.46267 |
| C | -0.52464  | -1.1082  | -0.18402 |
| C | -1.2874   | -2.27008 | -0.14754 |
| H | -0.78596  | -3.21022 | 0.05828  |
| C | -0.95023  | 2.5256   | -0.89809 |
| H | -0.31687  | 3.40462  | -0.95542 |
| C | 0.91741   | -1.18361 | 0.07296  |
| C | 1.08513   | 1.26855  | -0.30405 |
| N | 1.64753   | 0.02295  | 0.00951  |
| O | 1.50716   | -2.25854 | 0.33057  |
| O | 1.81082   | 2.28152  | -0.39088 |
| C | 3.05474   | -0.01138 | 0.43324  |
| H | -2.77819  | 3.53241  | -1.48279 |
| H | -3.25349  | -3.13946 | -0.25061 |
| H | -4.16766  | 1.52954  | -1.32919 |
| N | -4.72884  | -1.0537  | -0.67157 |
| H | -5.11552  | -1.98865 | -0.72418 |
| C | -5.70743  | -0.0238  | -0.29743 |
| H | -5.25907  | 0.66027  | 0.43254  |
| H | -6.01505  | 0.57252  | -1.16848 |
| C | -6.95446  | -0.67457 | 0.31573  |
| H | -7.37114  | -1.40578 | -0.394   |
| H | -6.66757  | -1.22958 | 1.21931  |
| C | -8.03735  | 0.35783  | 0.66501  |
| H | -7.62362  | 1.09484  | 1.36711  |
| H | -8.31792  | 0.91206  | -0.24159 |
| C | -9.28721  | -0.28992 | 1.27852  |
| H | -10.04666 | 0.46173  | 1.52078  |

|   |          |          |          |
|---|----------|----------|----------|
| H | -9.7377  | -1.01053 | 0.58484  |
| H | -9.03875 | -0.82543 | 2.20283  |
| H | 3.26425  | -1.06762 | 0.63441  |
| C | 3.18438  | 0.72858  | 1.79171  |
| O | 2.19189  | 1.07818  | 2.43593  |
| O | 4.44035  | 0.90374  | 2.24197  |
| C | 4.01963  | 0.47446  | -0.68311 |
| H | 3.5681   | 0.22093  | -1.64684 |
| H | 4.09614  | 1.56373  | -0.64862 |
| C | 5.37647  | -0.15862 | -0.60643 |
| N | 6.10112  | -0.1492  | 0.58927  |
| C | 7.25973  | -0.75322 | 0.36074  |
| H | 8.04302  | -0.91367 | 1.08231  |
| H | 8.09734  | -1.64435 | -1.37822 |
| N | 7.32582  | -1.15738 | -0.94598 |
| C | 6.13418  | -0.78776 | -1.57033 |
| H | 5.9297   | -0.998   | -2.60624 |
| H | 5.21079  | 0.4984   | 1.68172  |

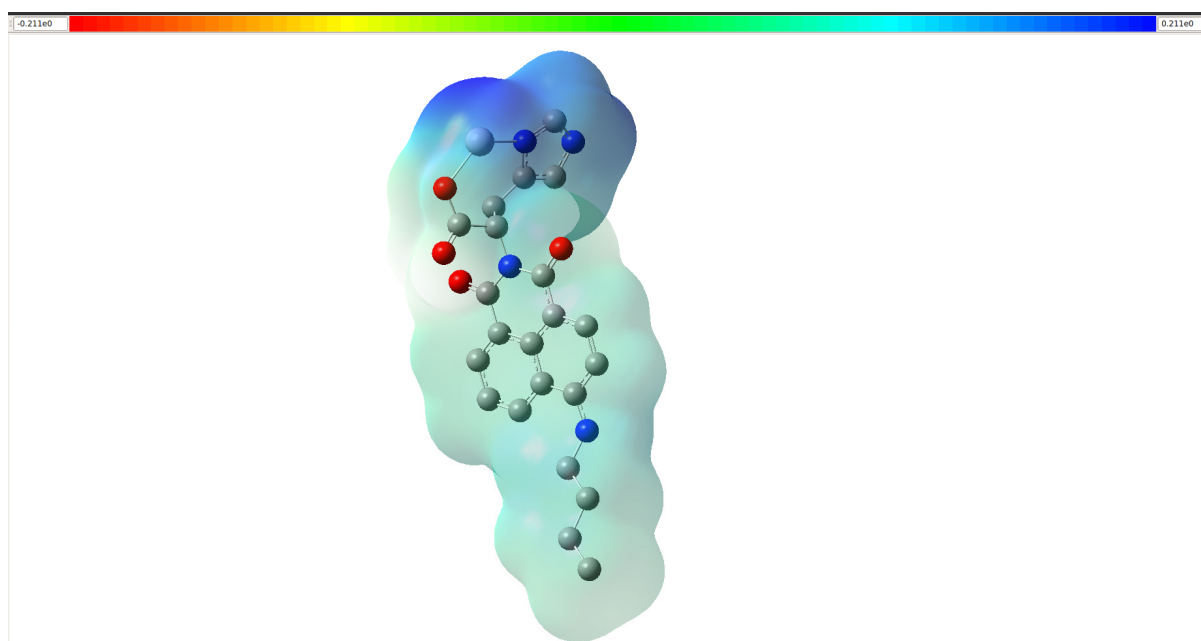

**Figure S12.** Molecular electrostatic potential map for compound **His-NMI-Bu** +  $\text{Hg}^{2+}$ ; blue and red colors indicate positive and negative charge.

**Table S5.** Calculated energies of Kohn-Sham molecular orbitals (MO) of **His-NMI-Bu** +  $\text{Hg}^{2+}$  using DFT at the CAM-B3LYP/ LANL2DZ level of theory.

| FMOs   | Energy/ Hartree | Energy/ eV |
|--------|-----------------|------------|
| LUMO+5 | -0.06829        | -1.858     |
| LUMO+4 | -0.07063        | -1.921     |
| LUMO+3 | -0.10415        | -2.834     |
| LUMO+2 | -0.12209        | -3.322     |

|        |          |         |
|--------|----------|---------|
| LUMO+1 | -0.13199 | -3.591  |
| LUMO   | -0.23405 | -6.368  |
| HOMO   | -0.32655 | -8.885  |
| HOMO-1 | -0.39262 | -10.683 |
| HOMO-2 | -0.40088 | -10.908 |
| HOMO-3 | -0.41129 | -11.191 |
| HOMO-4 | -0.41514 | -11.296 |
| HOMO-5 | -0.42664 | -11.609 |

Compound: **His-NMI-Bu + Hg<sup>2+</sup>**

Symbolic Z-matrix:

Charge = 1 Multiplicity = 1

|   |          |          |          |
|---|----------|----------|----------|
| C | 4.75274  | -0.83556 | -1.44138 |
| C | 4.79405  | 0.95025  | 0.36256  |
| C | 4.09874  | 0.0152   | -0.50565 |
| C | 4.02147  | 1.82718  | 1.16237  |
| C | 4.04976  | -1.71819 | -2.24797 |
| C | 1.96888  | -0.95741 | -1.27967 |
| C | 2.66737  | -0.03501 | -0.4479  |
| C | 1.94005  | 0.83795  | 0.40725  |
| C | 2.63452  | 1.76811  | 1.18658  |
| H | 2.06563  | 2.4317   | 1.82982  |
| C | 2.64718  | -1.79155 | -2.15735 |
| H | 2.07558  | -2.48425 | -2.76627 |
| C | 0.49482  | 0.77305  | 0.49648  |
| C | 0.5018   | -1.04581 | -1.22431 |
| N | -0.15474 | -0.19074 | -0.32087 |
| O | -0.21299 | 1.50676  | 1.2355   |
| O | -0.18118 | -1.8066  | -1.94674 |
| C | -1.58712 | -0.37252 | -0.11225 |
| H | 4.5823   | -2.35172 | -2.94829 |
| H | 4.53666  | 2.54033  | 1.79956  |
| H | 5.82418  | -0.79624 | -1.55629 |
| N | 6.15557  | 1.0646   | 0.4779   |
| H | 6.46132  | 1.82106  | 1.07968  |
| C | 7.24737  | 0.18031  | 0.04803  |
| H | 6.97603  | -0.8664  | 0.23179  |
| H | 7.45108  | 0.29876  | -1.02487 |
| C | 8.52193  | 0.51755  | 0.8312   |
| H | 8.77557  | 1.57731  | 0.67927  |
| H | 8.33856  | 0.37776  | 1.90547  |
| C | 9.71359  | -0.35062 | 0.39825  |
| H | 9.46353  | -1.41088 | 0.54169  |
| H | 9.89446  | -0.21252 | -0.67675 |
| C | 10.9919  | -0.01563 | 1.1801   |
| H | 11.82878 | -0.64431 | 0.85824  |
| H | 11.28328 | 1.03102  | 1.03045  |
| H | 10.84941 | -0.17397 | 2.25582  |

|    |          |          |          |
|----|----------|----------|----------|
| H  | -1.82634 | 0.41534  | 0.61829  |
| C  | -1.84546 | -1.72104 | 0.61764  |
| O  | -0.95706 | -2.50465 | 0.91955  |
| O  | -3.15199 | -1.97072 | 0.99425  |
| C  | -2.42684 | -0.14914 | -1.41713 |
| H  | -1.74088 | -0.14275 | -2.26332 |
| H  | -3.07334 | -1.01546 | -1.61023 |
| C  | -3.23529 | 1.12094  | -1.42951 |
| N  | -4.35498 | 1.31851  | -0.58541 |
| C  | -4.86592 | 2.53073  | -0.83713 |
| H  | -5.71946 | 2.98039  | -0.35778 |
| H  | -4.29765 | 4.04271  | -2.19105 |
| N  | -4.13118 | 3.11945  | -1.80889 |
| C  | -3.1078  | 2.25479  | -2.19357 |
| H  | -2.38779 | 2.50653  | -2.95358 |
| Hg | -4.52255 | -0.39509 | 0.78973  |

#### Binding energy calculation:

$$E = E_{\text{His-NMI-Bu+Hg}^{2+}} - (E_{\text{His-NMI-Bu}} + E_{\text{HgCl}_2} - 1/2 E_{\text{H}_2}) / \text{Hartree}$$

$$= -1412.477 - (-1370.669 - 72.583 + 0.587) / \text{Hartree}$$

$$= -30.188 \text{ Hartree}$$

$$= -7.9 \times 10^4 \text{ KJ/ mol}$$

*Note: Here, E is considered as electronic energy of the optimized geometry.*

#### 4. Job's plot and fitting for binding constant:

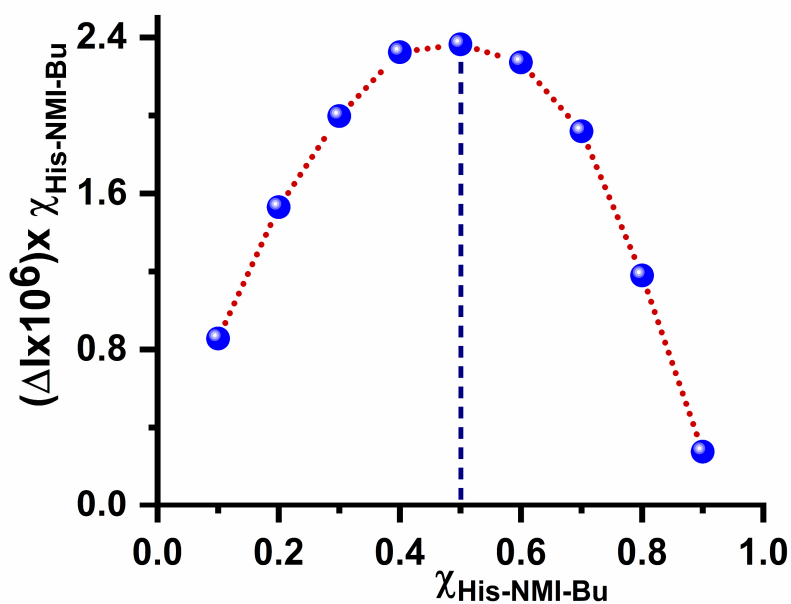

**Figure S13.** Job's plot for **His-NMI-Bu** with  $\text{HgCl}_2$  in MES buffer at pH 6.2.

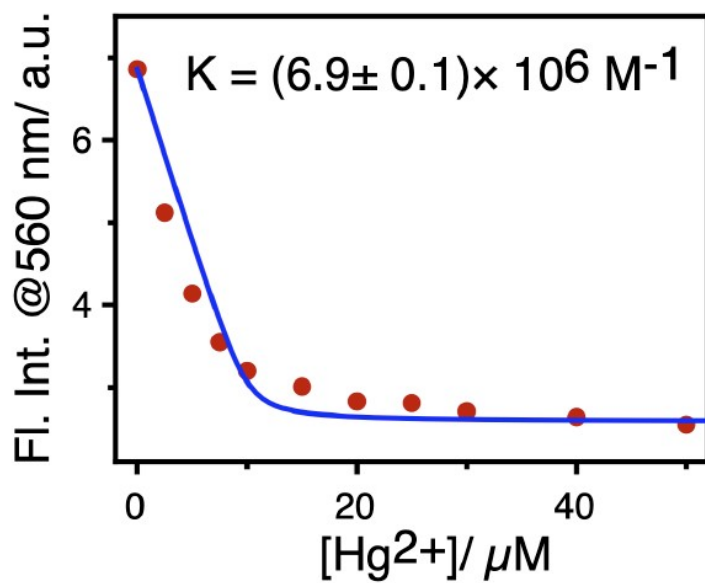

**Figure S14.** Fitted plot of fluorescence intensity as a function of  $\text{Hg}^{2+}$  concentration resulting the binding constant value.

## 5. Evidence for probe-metal complexation:

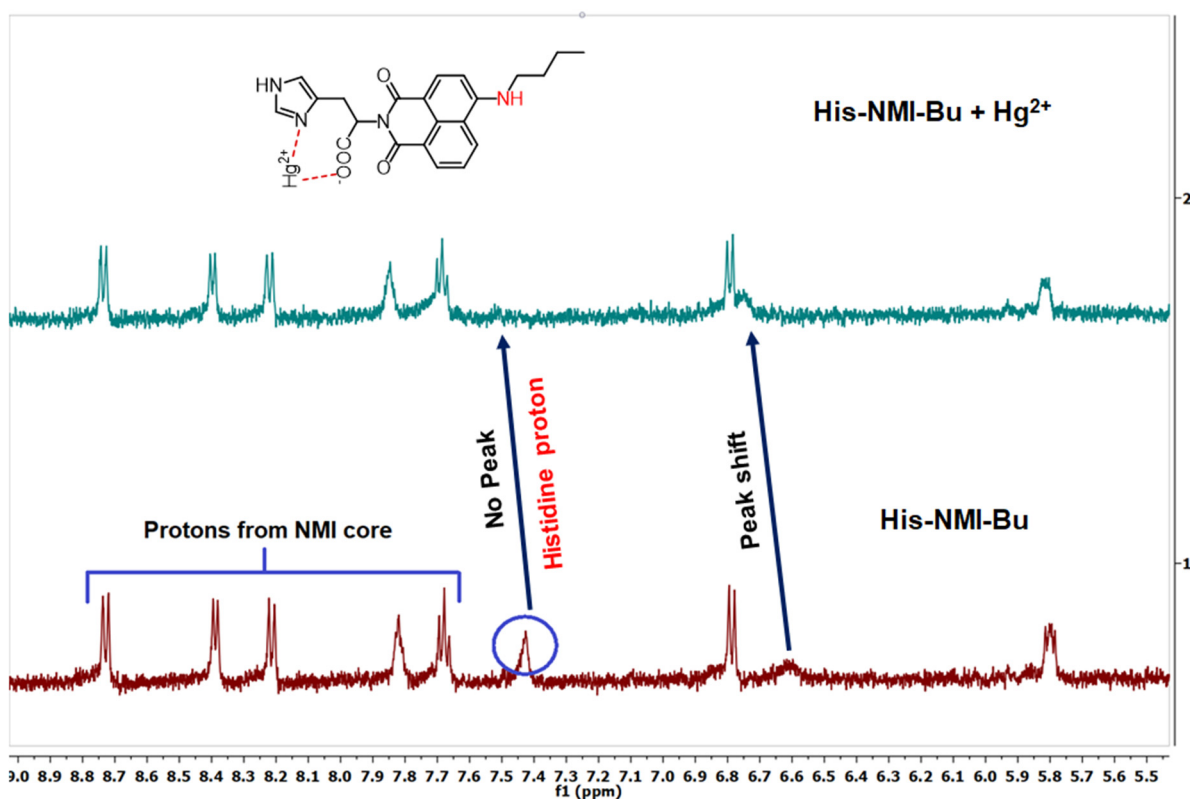

**Figure S15.** Comparison of  $^1\text{H}$  NMR spectra between only **His-NMI-Bu** (1.0 mM) and **His-NMI-Bu** + 2.0 mM  $\text{HgCl}_2$  complex in  $\text{DMSO-d}_6$  recorded at 500 MHz.



**Note:**  $^1\text{H}$  NMR spectra of the probe shows appearance of peaks corresponding to NMI core in 7.6-9.0 ppm region. The peak positioned at 7.4 ppm originates from histidine moiety. After chelation of the probe with  $\text{Hg}^{2+}$ , the complex shows disappearance of 7.4 ppm peak and the peak at 6.6 ppm exhibits downfield shift with respect to probe only. The vanishing of peak occurs due to formation of charged species located on imidazole N-atom. Also, the downfield shift for 6.6 ppm peak corresponding to  $\text{H}_a/\text{H}_b$  proton might be due to experiencing different magnetic field after formation of charged complex. This NMR titration results indicate formation of metal-probe complex via chelation which is the key complexation mechanism here.

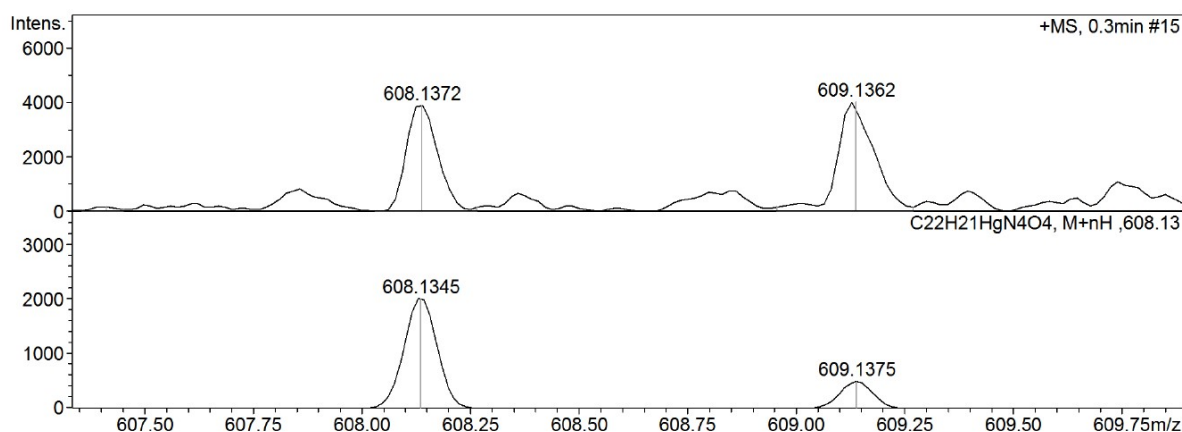

**Figure S16.** ESI mass spectrum of His-NMI-Bu +  $\text{Hg}^{2+}$  complex; calculated mass – 607.1264 and obtained mass –  $m/z$  608.1372  $[\text{M} + \text{H}]^+$ .

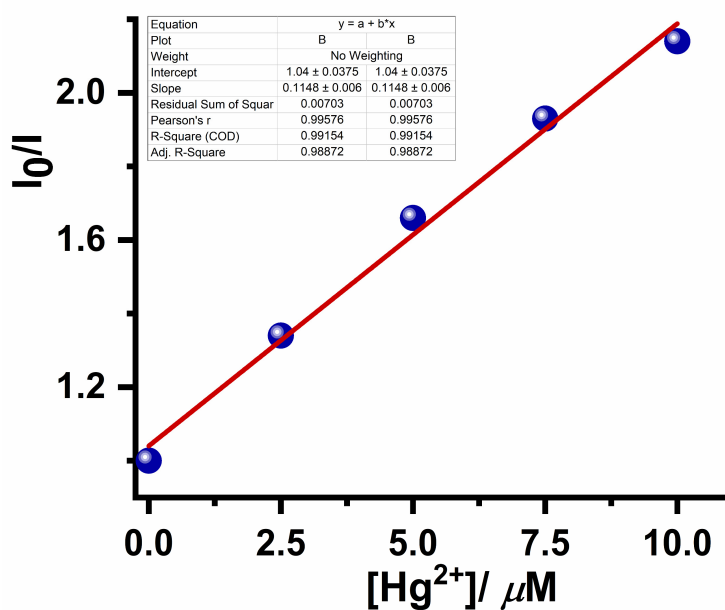

**Figure S17.** Plot of  $I_0/I$  vs concentration of  $\text{Hg}^{2+}$  derived from concentration-dependent fluorescence study in MES buffer (pH = 6.2).

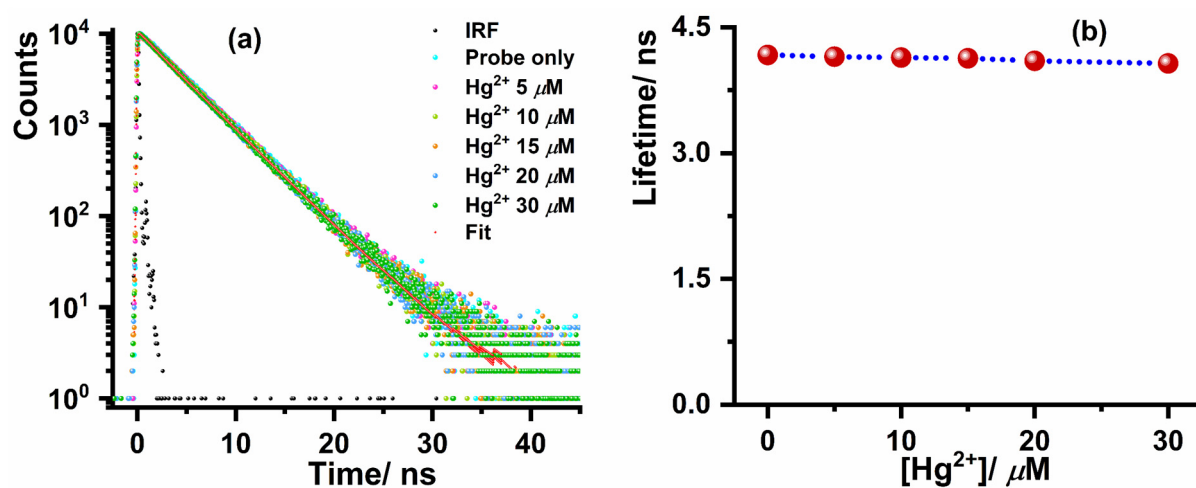

**Figure S18.** (a) Time-resolved fluorescence decay of **His-NMI-Bu** with  $\text{HgCl}_2$  of different concentration in MES buffer (b) plot for average lifetime vs concentration of  $\text{Hg}^{2+}$  in MES buffer (pH = 6.2).

**Table S6.** Detailed fluorescence lifetime values with contribution of components in MES buffer pH 6.2.

| Entry                                     | $\tau_1/ \text{ ns (Cont.\%)}$ | $\tau_2/ \text{ ns (Cont.\%)}$ | $\tau_{\text{avg}}/ \text{ ns}$ |
|-------------------------------------------|--------------------------------|--------------------------------|---------------------------------|
| Probe                                     | 2.96 (13%)                     | 4.30 (87%)                     | 4.17                            |
| Probe + 5 $\mu\text{M}$ $\text{Hg}^{2+}$  | 2.06 (4%)                      | 4.20 (96%)                     | 4.15                            |
| Probe + 10 $\mu\text{M}$ $\text{Hg}^{2+}$ | 1.11 (2%)                      | 4.15 (98%)                     | 4.14                            |
| Probe + 15 $\mu\text{M}$ $\text{Hg}^{2+}$ | 1.48 (3%)                      | 4.16 (97%)                     | 4.13                            |
| Probe + 20 $\mu\text{M}$ $\text{Hg}^{2+}$ | 1.54 (4%)                      | 4.14 (96%)                     | 4.10                            |
| Probe + 30 $\mu\text{M}$ $\text{Hg}^{2+}$ | 1.08 (3%)                      | 4.10 (97%)                     | 4.07                            |

## 6. Bioimaging studies:

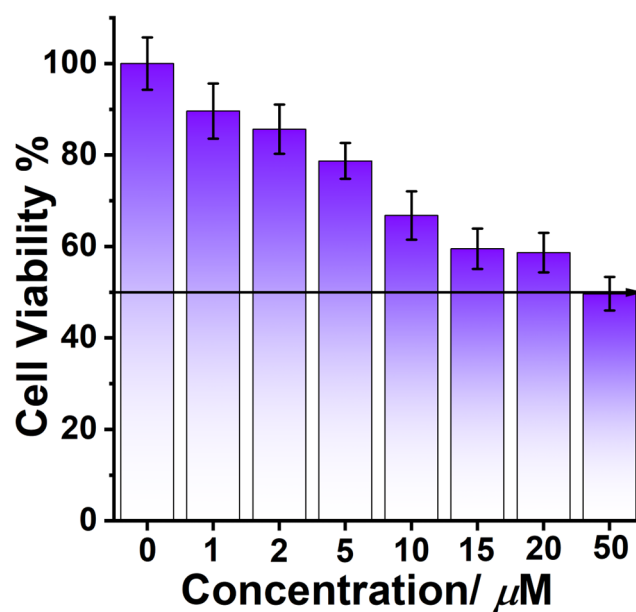

**Figure S19.** MTT assay showing cell viability in the presence of probe **His-NMI-Bu** (0-50  $\mu\text{M}$ ).

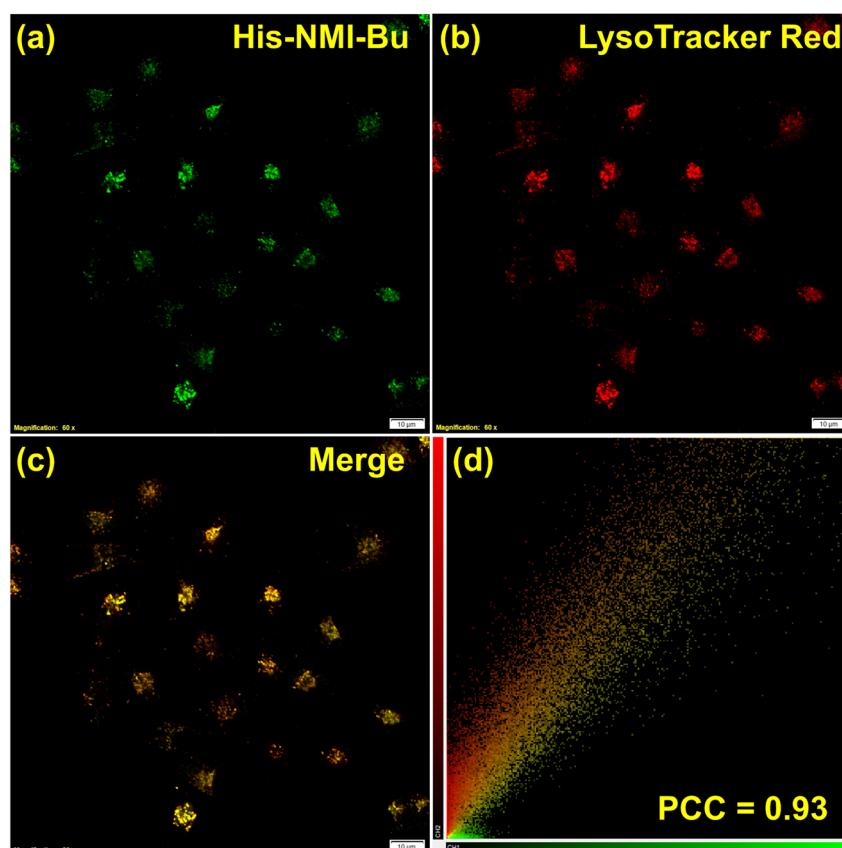

**Figure S20.** Confocal live-cell colocalization experiments in HeLa cells. (a) shows the FITC channel images stained with 5  $\mu\text{M}$  **His-NMI-Bu**; (b) show TRITC channel images stained with 0.3  $\mu\text{M}$  LysoTracker Red (c) shows the merge image of (a) and (b); (d) shows the scatter plot to get the respective Pearson's correlation coefficient.

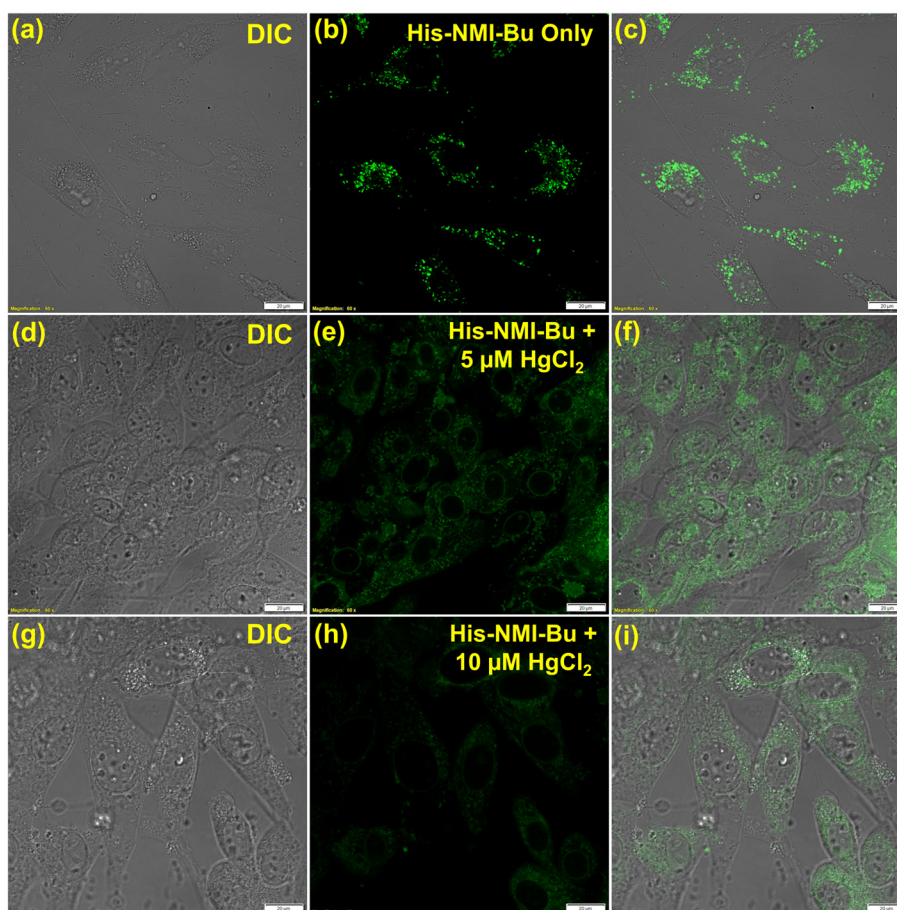

**Figure S21.** CLSM images of live BHK-21 cells showing the intracellular response of  $\text{Hg}^{2+}$ . (a-c) show images of cells stained with  $5\ \mu\text{M}$  **His-NMI-Bu** only; (d-f) show images of cells pre-incubated with  $5\ \mu\text{M}$   $\text{HgCl}_2$  and stained with  $5\ \mu\text{M}$  **His-NMI-Bu**; (g-i) show images of cells pre-incubated with  $10\ \mu\text{M}$   $\text{HgCl}_2$  and stained with  $5\ \mu\text{M}$  **His-NMI-Bu**. The gradual decrease in fluorescence intensity confirms the detection of  $\text{Hg}^{2+}$  inside lysosomal compartment.
